# Supplementary material
Source: PubMed Central journal article supplement (PMC4842107)
Supplement: NIHMS747881-supplement-2.pdf [file NIHMS747881-supplement-2.pdf]

Supplementary Table 1. Clinical studies reporting reticular drusen / SDD prevalence (chronological order)

| Ref #         | Patient population <sup>a</sup>                                     | N, persons | Age, years | Imaging modality <sup>b</sup>                 | Area studied     | Summarized SDD/RPD definitions based on en-face modalities <sup>c</sup>                                           | % affected, person-level (PL) or eye-level (EL) |
|---------------|---------------------------------------------------------------------|------------|------------|-----------------------------------------------|------------------|-------------------------------------------------------------------------------------------------------------------|-------------------------------------------------|
| <sup>12</sup> | Newly presenting AMD case                                           | 100        | 53-85      | CFP, RF, FA                                   | macula           | Interlacing network of lesions of 125-250 µm                                                                      | 13.0% (PL)                                      |
| <sup>16</sup> | Neovascular-AMD in one eye, more than 10 large drusen in fellow eye | 121        | ≥ 50       | CFP, RF, FA                                   | macula           | Interlacing network of lesions of 125-250 µm                                                                      | 3.0% (PL)                                       |
| <sup>17</sup> | Early AMD                                                           | 125        | 55-86      | CFP, FAF                                      | macula           | Reticular pattern                                                                                                 | 10.0% (EL)                                      |
| <sup>18</sup> | Early AMD in both eyes or with GA in fellow eye                     | 83         | -          | CFP, FAF-SW                                   | macula           | Groups of lesions; interlacing network of lesions of 125-250 µm                                                   | 8.4% (EL)                                       |
|               | Early AMD in one eye, CNV in fellow eye                             | 55         |            |                                               |                  |                                                                                                                   | 36.0% (EL)                                      |
| <sup>19</sup> | Newly diagnosed neovascular-AMD                                     | 100        | 57-96      | Blue channel of CFP, RF, FA or ICG            | 50° macula       | Not described                                                                                                     | 24.0% (EL)                                      |
| <sup>20</sup> | Population based                                                    | 3654       | ≥49        | CFP <sup>d</sup>                              | 30° 5-field      | Networks of broad, interlacing ribbons                                                                            | 22.9% (PL)                                      |
| <sup>21</sup> | Population based                                                    | 4926       | 43-86      | CFP                                           | 30° 3-field      | Networks of broad, interlacing ribbons                                                                            | 3.0% (PL)                                       |
| <sup>14</sup> | Late AMD in one or both eyes                                        | 131        | 75-86      | Blue channel of CFP, SD-OCT, IR               | 20-25° macula    | ≥5 lesions correlated with SD-OCT                                                                                 | 10.1% (EL) <sup>e</sup> -                       |
|               | Early or intermediate AMD                                           | 22         |            |                                               |                  |                                                                                                                   | 36.6% (EL) <sup>f</sup>                         |
| <sup>14</sup> | Non-AMD                                                             | 101        | 68-80      | Blue channel of CFP, SD-OCT, IR               | 20-25° macula    | ≥5 lesions correlated with SD-OCT                                                                                 | 6% (EL) <sup>1</sup>                            |
| <sup>2</sup>  | GA                                                                  | 458        | 51-95      | FAF-SW, NIR-IR, BR, RF, CFP                   | 30 - 40° 3-field | Network of round or oval irregularities of 50-400 µm, individual "target"; networks of broad, interlacing ribbons | 18% (PL) <sup>g</sup> - 62.0% (PL) <sup>h</sup> |
| <sup>22</sup> | GA                                                                  | 67         | mean 83    | FAF-SW, IR (810 nm) and/or RF                 | Not described    | Groups of lesions; interlacing network of lesions of 125-250 µm                                                   | 91.0% (PL) <sup>1</sup>                         |
| <sup>23</sup> | GA                                                                  | 13         | 65-85      | FAF-SW, SD-OCT                                | 30° macula       | Reticular pattern in multiple areas of <200 µm diameter                                                           | 100% (EL)                                       |
|               | early AMD                                                           | 19         |            |                                               |                  |                                                                                                                   | 52.6% (EL)                                      |
| <sup>24</sup> | Dry AMD, with or without GA                                         | 62         | mean 64    | FAF-SW, FAF-NIR, NIA, SD-OCT                  | 30° macula       | ≥5 lesions correlated with SD-OCT                                                                                 | 29.0% (EL)                                      |
| <sup>25</sup> | Pigment epithelium detachment in AMD                                | 104        | 54-92      | NIR-R                                         | 30° macula       | Pattern of lesions of 25-1,000 µm, individual "target"; whiter compare to soft drusen                             | 53.9% (PL)                                      |
| <sup>26</sup> | Early or late AMD                                                   | 114        | 52-92      | CFP, NIR-R, FAF, NIR-FAF, BR, FA, ICG, SD-OCT | 10-40° macula    | Group of lesions; interlacing network of lesions of 125-250 µm                                                    | 16.8% (EL)                                      |
| <sup>27</sup> | AMD with primary geographic atrophy                                 | 99         | mean 82    | FAF, NIR-R                                    | 30° macula       | Group of lesions in area of 2-disk diameters                                                                      | 83.9% (EL)                                      |
| <sup>28</sup> | Dry AMD with GA in at least one eye                                 | 92         | 59-96      | FAF and/or NIR-R                              | 30° macula       | Pattern of lesions in area of 2-disk diameters                                                                    | 93.6% (PL)                                      |
| <sup>29</sup> | AMD patients suspected to show RPD on basis of funduscopy or CFP    | 100        | mean 81    | FAF, NIR-R                                    | 30° macula       | Network of round or oval irregularities of 50-400 µm, individual "target"                                         | 65.0% (EL)                                      |

Abbreviation: <sup>a</sup> patient population as described by authors; <sup>b</sup> imaging modality used to confirm SDD diagnosis; <sup>c</sup> summarized by author AVZ; <sup>d</sup> combined with indistinct drusen; <sup>e</sup> by CFP; <sup>f</sup> by SD-OCT; <sup>g</sup> by ≥1 fundus photography modality; <sup>h</sup> by ≥1 cSLO imaging modality; <sup>1</sup> by any imaging modality; SDD = subretinal drusenoid deposits; RPD = reticular pseudodrusen; PL = person-level; EL = eye-level; AMD = age-related macular degeneration; GA = geographic atrophy; CNV = choroidal neovascular membrane; FA= fluorescein angiography; FAF-SW = fundus autofluorescence, short wavelength (488 nm excitation); FAF-NIR = fundus autofluorescence, near infrared (830 nm excitation); FAF = fundus autofluorescence (488 nm excitation); NIR-R = near infrared reflectance (820 nm excitation); NIA = near-infrared autofluorescence (787 nm excitation); NIR-FAF = near infrared reflectance, fundus autofluorescence (790 nm excitation); BR = blue reflectance (488 nm excitation); RF = red-free light; IR = infrared reflectance; ICG = indocyanine green angiography; CFP = color fundus photos; SD-OCT = spectral domain optical coherence tomography; cSLO = confocal scanning laser ophthalmoscope.
