# Supplementary material
Source: PubMed Central journal article supplement (PMC4842107)
Supplement: NIHMS747881-supplement-4.pdf [file NIHMS747881-supplement-4.pdf]

Supplementary Table 5. Blood parameters stratified by SDD presence at the person-level using strict criteria

|                                                 | SDD, N (%) | No SDD, N (%) | p-value |
|-------------------------------------------------|------------|---------------|---------|
| Total sample                                    | 197 (32.2) | 414 (67.8)    | --      |
| C-reactive protein µg/mL quartiles <sup>a</sup> |            |               |         |
| ≤ 1.16                                          | 38 (26.9)  | 103 (73.1)    | 0.37    |
| 1.17 - 2.47                                     | 46 (31.7)  | 99 (68.3)     |         |
| 2.48 – 5.02                                     | 49 (36.0)  | 87 (64.0)     |         |
| ≥5.03                                           | 51 (34.7)  | 96 (65.3)     |         |
| C3 µg/mL quartiles                              |            |               |         |
| ≤ 810.69                                        | 40 (28.2)  | 102 (71.8)    | 0.15    |
| 810.70 – 960.60                                 | 51 (35.9)  | 91 (64.1)     |         |
| 960.61 – 1247.32                                | 38 (27.5)  | 100 (72.5)    |         |
| ≥1247.33                                        | 55 (37.7)  | 91 (62.3)     |         |
| C4 µg/mL quartiles                              |            |               |         |
| ≤ 409.70                                        | 46 (31.5)  | 100 (68.5)    | 0.84    |
| 409.71 – 523.86                                 | 49 (35.0)  | 91 (65.0)     |         |
| 523.87 – 670.24                                 | 47 (33.3)  | 94 (66.7)     |         |
| ≥670.25                                         | 43 (30.3)  | 99 (69.7)     |         |
| C5 µg/mL quartiles                              |            |               |         |
| ≤ 54.44                                         | 42 (30.4)  | 96 (69.6)     | 0.62    |
| 54.45 – 85.37                                   | 53 (36.6)  | 92 (63.4)     |         |
| 85.38 – 115.60                                  | 48 (32.9)  | 98 (67.1)     |         |
| ≥115.61                                         | 42 (30.0)  | 98 (70.0)     |         |
| C3a µg/mL quartiles                             |            |               |         |
| ≤ 42.16                                         | 44 (29.9)  | 103 (70.1)    | 0.58    |
| 42.17 – 83.68                                   | 52 (36.6)  | 90 (63.4)     |         |
| 83.69 – 128.75                                  | 47 (33.6)  | 93 (66.4)     |         |
| ≥128.76                                         | 42 (30.2)  | 97 (69.8)     |         |
| C4a µg/mL quartiles                             |            |               |         |
| ≤ 12.27                                         | 46 (32.2)  | 97 (67.8)     | 0.96    |
| 12.28 – 23.60                                   | 46 (32.4)  | 96 (67.6)     |         |
| 23.61 – 47.75                                   | 48 (34.3)  | 92 (65.7)     |         |
| ≥47.76                                          | 45 (31.3)  | 99 (68.7)     |         |
| C5a µg/mL quartiles                             |            |               |         |
| ≤ 66.67                                         | 48 (34.0)  | 93 (66.0)     | 0.95    |
| 66.68 – 151.80                                  | 45 (31.3)  | 99 (68.7)     |         |
| 151.81 – 428.59                                 | 45 (33.1)  | 91 (66.9)     |         |
| ≥428.60                                         | 46 (31.5)  | 100 (68.5)    |         |
| Apo A-I mg/dL quartiles <sup>b</sup>            |            |               |         |
| ≤ 140.0                                         | 43 (28.9)  | 106 (71.1)    | 0.73    |
| 141.0 – 160.0                                   | 48 (32.9)  | 98 (67.1)     |         |
| 161.0 - 181.0                                   | 46 (32.6)  | 95 (67.4)     |         |
| ≥182.0                                          | 51 (34.9)  | 95 (65.1)     |         |
| Apo B mg/dL quartiles                           |            |               |         |
| ≤ 74.0                                          | 49 (33.1)  | 99 (66.9)     | 0.11    |
| 75.0 – 89.0                                     | 58 (39.5)  | 89 (60.5)     |         |
| 90.0 – 106.0                                    | 43 (29.9)  | 101 (70.1)    |         |
| ≥107.0                                          | 38 (26.6)  | 105 (73.4)    |         |

Abbreviation: <sup>a, b</sup>Data for the inflammatory marker and the apolipoprotein analyses were unavailable for 42 and 29 participants, respectively, because the participants declined blood specimen collection or because of laboratory analysis failure. SDD = subretinal drusenoid deposits; C3-5 = complement proteins; C3-5a = complement fragments; Apo A-I = apolipoprotein A-I; Apo B = apolipoprotein B.
